# Supplementary material for: Matrix Effects of Different Water Types on the Efficiency of Fumonisin B1 Removal by Photolysis and Photocatalysis Using Ternary- and Binary-Structured ZnO-Based Nanocrystallites
Source: MDPI journal article supplement (doi:10.3390/catal13020375), 2023-02-08
Supplement: s1 [file s1]

# Matrix Effects of Different Water Types on the Efficiency of Fumonisin B1 Removal by Photolysis and Photocatalysis Using Ternary and Binary Structured ZnO-Based Nanocrystallites

Ivana Jevtić<sup>1,†</sup>, Sandra Jakšić<sup>2,†</sup>, Daniela Šojić Merkulov<sup>3</sup>, Szabolcs Bognár<sup>3</sup>, Biljana Abramović<sup>3</sup> and Tamara Ivetić<sup>4,\*</sup>

<sup>1</sup> Academy of Professional Studies Šabac, Hajduk Veljkova 10, 15000 Šabac, Serbia; ivana.dabic@yahoo.com (I.J.)

<sup>2</sup> Scientific Veterinary Institute Novi Sad, Rumenački put 20, 21000 Novi Sad, Serbia; sandra@niv.ns.ac.rs (S.J.)

<sup>3</sup> Department of Chemistry, Biochemistry and Environmental Protection, University of Novi Sad Faculty of Sciences, Trg Dositeja Obradovića 3, 21000 Novi Sad, Serbia; daniela.sojic@dh.uns.ac.rs (D.Š.M.); sabolc.bognar@dh.uns.ac.rs (S.B.); biljana.abramovic@dh.uns.ac.rs (B.A.)

<sup>4</sup> Department of Physics, University of Novi Sad Faculty of Sciences, Trg Dositeja Obradovića 4, 21000 Novi Sad, Serbia; tamara.ivetic@df.uns.ac.rs (T.I.)

\* Correspondence: tamara.ivetic@df.uns.ac.rs

† These authors are equal major contributors to this work.

**Table S1.** Effect of photolysis and photocatalysis using UV irradiation at pH ~8 on degradation rate constant of FB<sub>1</sub> (1.39 µmol/dm<sup>3</sup>).

| Treatment                                      | $k'^a$ (min <sup>-1</sup> ) | $r^b$ |
|------------------------------------------------|-----------------------------|-------|
| UV                                             | 0.0058                      | 0.985 |
| UV/H <sub>2</sub> O <sub>2</sub>               | 0.0772                      | 0.999 |
| UV/S <sub>2</sub> O <sub>8</sub> <sup>2-</sup> | 0.0714                      | 0.996 |
| UV/ZS-2                                        | 0.0390                      | 0.992 |

<sup>a</sup>Degradation rate constants determined for the first 60 min of irradiation. <sup>b</sup>Linear regression coefficient.

**Table S2.** Effect of different types of water on degradation rate constant of FB<sub>1</sub> (1.39 µmol/dm<sup>3</sup>) using UV irradiation at pH ~8.

| Water type   | $k'^a$ (min <sup>-1</sup> ) | $r^b$ |
|--------------|-----------------------------|-------|
| UPW          | 0.0058                      | 0.992 |
| Tap water    | 0.0093                      | 0.981 |
| Danube River | 0.0095                      | 0.990 |
| Ground water | 0.0079                      | 0.986 |

<sup>a</sup>Degradation rate constants determined for the first 60 min of irradiation. <sup>b</sup>Linear regression coefficient.

**Table S3.** Effect of different types of water on degradation rate constant of FB<sub>1</sub> (1.39 µmol/dm<sup>3</sup>) using indirect photolysis at pH ~8.

| Water type   | UV/H <sub>2</sub> O <sub>2</sub>            |                       | UV/S <sub>2</sub> O <sub>8</sub> <sup>2-</sup> |                       |
|--------------|---------------------------------------------|-----------------------|------------------------------------------------|-----------------------|
|              | <i>k'</i> <sup>a</sup> (min <sup>-1</sup> ) | <i>r</i> <sup>b</sup> | <i>k'</i> <sup>a</sup> (min <sup>-1</sup> )    | <i>r</i> <sup>b</sup> |
| UPW          | 0.0773                                      | 0.999                 | 0.0714                                         | 0.997                 |
| Tap water    | 0.0277                                      | 0.991                 | 0.0329                                         | 0.996                 |
| Danube River | 0.0211                                      | 0.999                 | 0.0108                                         | 0.975                 |
| Ground water | 0.0222                                      | 0.997                 | 0.0116                                         | 0.995                 |

<sup>a</sup>Degradation rate constants determined for the first 60 min of irradiation. <sup>b</sup>Linear regression coefficient.

**Table S4.** Effect of different types of water on degradation rate constant of FB<sub>1</sub> (1.39 µmol/dm<sup>3</sup>) using ZS-2 photocatalyst at pH ~8.

| Water type   | <i>k'</i> <sup>a</sup> (min <sup>-1</sup> ) | <i>r</i> <sup>b</sup> |
|--------------|---------------------------------------------|-----------------------|
| UPW          | 0.0404                                      | 0.983                 |
| Tap water    | 0.0244                                      | 0.944                 |
| Danube River | 0.0130                                      | 0.898                 |
| Ground water | 0.0245                                      | 0.942                 |

<sup>a</sup>Degradation rate constants determined for the first 20 min of irradiation. <sup>b</sup>Linear regression coefficient.

**Table S5.** Effect of different ions and HA on degradation rate constant of FB<sub>1</sub> (1.39 µmol/dm<sup>3</sup>) at pH 7.7–9.0 using UV irradiation.

| Ions/HA                         | <i>k'</i> <sup>a</sup> (min <sup>-1</sup> ) | <i>r</i> <sup>b</sup> |
|---------------------------------|---------------------------------------------|-----------------------|
| –                               | 0.0058                                      | 0.992                 |
| NaCl                            | 0.0257                                      | 0.999                 |
| MgCl <sub>2</sub>               | 0.0198                                      | 0.992                 |
| CaCl <sub>2</sub>               | 0.0155                                      | 0.879                 |
| HA                              | 0.0117                                      | 0.994                 |
| NaNO <sub>3</sub>               | 0.0136                                      | 0.997                 |
| NaHCO <sub>3</sub>              | 0.0023                                      | 0.987                 |
| Na <sub>2</sub> SO <sub>4</sub> | 0.0115                                      | 0.994                 |

<sup>a</sup>Degradation rate constants determined for the first 60 min of irradiation. <sup>b</sup>Linear regression coefficient.

**Table S6.** Effect of different ions and HA on degradation rate constant of FB<sub>1</sub> (1.39 µmol/dm<sup>3</sup>) at pH 7.7–9.0 using UV/H<sub>2</sub>O<sub>2</sub> treatment.

| Ions/HA                         | $k'^a$ (min <sup>-1</sup> ) | $r^b$ |
|---------------------------------|-----------------------------|-------|
| –                               | 0.0772                      | 0.998 |
| NaCl                            | 0.0237                      | 0.999 |
| MgCl <sub>2</sub>               | 0.0122                      | 0.929 |
| CaCl <sub>2</sub>               | 0.0091                      | 0.889 |
| HA                              | 0.0181                      | 0.974 |
| NaNO <sub>3</sub>               | 0.0192                      | 0.995 |
| NaHCO <sub>3</sub>              | 0.0005                      | 0.997 |
| Na <sub>2</sub> SO <sub>4</sub> | 0.0248                      | 0.992 |

<sup>a</sup>Degradation rate constants determined for the first 60 min of irradiation. <sup>b</sup>Linear regression coefficient.

**Table S7.** Effect of different ions and HA on degradation rate constant of FB<sub>1</sub> (1.39 µmol/dm<sup>3</sup>) at pH 7.7–9.0 using ZS-2 photocatayst.

| Ions/HA                         | $k'^a$ (min <sup>-1</sup> ) | $r^b$ |
|---------------------------------|-----------------------------|-------|
| –                               | 0.0405                      | 0.983 |
| NaCl                            | 0.0336                      | 0.962 |
| MgCl <sub>2</sub>               | 0.0240                      | 0.955 |
| CaCl <sub>2</sub>               | 0.0444                      | 0.962 |
| HA                              | 0.0406                      | 0.982 |
| NaNO <sub>3</sub>               | 0.0317                      | 0.972 |
| NaHCO <sub>3</sub>              | 0.0377                      | 0.988 |
| Na <sub>2</sub> SO <sub>4</sub> | 0.0252                      | 0.987 |

<sup>a</sup>Degradation rate constants determined for the first 20 min of irradiation. <sup>b</sup>Linear regression coefficient.

**Table S8.** The physicochemical characteristics of the analyzed water types.

| Parameter                                | Water type       |                  |                  |                  |
|------------------------------------------|------------------|------------------|------------------|------------------|
|                                          | Danube River     | Ground water     | Tap water        | UPW              |
| pH                                       | 7.70             | 7.62             | 7.30             | 6.56             |
| Conductivity at 25 °C (µS/cm)            | 333              | 466              | 516              | 0.055            |
| TOC (mg/dm <sup>3</sup> ) <sup>a</sup>   | 2.30             | 0.78             | 1.80             | <DL <sup>b</sup> |
| Hydrogen carbonate (mg/dm <sup>3</sup> ) | 209              | 768              | 238              | <DL <sup>b</sup> |
| Fluoride (mg/dm <sup>3</sup> )           | <DL <sup>b</sup> | 0.469            | 0.130            | <DL <sup>b</sup> |
| Chloride (mg/dm <sup>3</sup> )           | 44.02            | 61.39            | 16.50            | <DL <sup>b</sup> |
| Bromide (mg/dm <sup>3</sup> )            | 0.080            | 0.090            | <0.005           | <DL <sup>b</sup> |
| Sulphate (mg/dm <sup>3</sup> )           | 15.52            | 0.486            | 35.0             | <DL <sup>b</sup> |
| Nitrate (mg/dm <sup>3</sup> )            | 3.86             | 0.099            | 1.87             | <DL <sup>b</sup> |
| Nitrite (mg/dm <sup>3</sup> )            | 2.76             | 17.53            | <0.01            | <DL <sup>b</sup> |
| Phosphate (mg/dm <sup>3</sup> )          | 0.202            | 0.052            | <DL <sup>b</sup> | <DL <sup>b</sup> |
| Calcium (mg/dm <sup>3</sup> )            | 0.136            | <DL <sup>b</sup> | 70.49            | <DL <sup>b</sup> |
| Potassium (mg/dm <sup>3</sup> )          | 0.030            | <DL <sup>b</sup> | 3.75             | <DL <sup>b</sup> |
| Lithium (mg/dm <sup>3</sup> )            | <DL <sup>b</sup> | 0.024            | <0.005           | <DL <sup>b</sup> |
| Magnesium (mg/dm <sup>3</sup> )          | 0.078            | 0.129            | 20.3             | <DL <sup>b</sup> |
| Sodium (mg/dm <sup>3</sup> )             | 0.043            | 0.219            | 19.2             | <DL <sup>b</sup> |
| Ammonium-ion (mg/dm <sup>3</sup> )       | <DL <sup>b</sup> | 15.76            | <0.03            | <DL <sup>b</sup> |

<sup>a</sup>TOC: total organic carbon. <sup>b</sup>DL: detection limit.
